# Supplementary material for: Na3.12Fe2.44(P2O7)2/multi-walled carbon nanotube composite as a cathode material for sodium-ion batteries
Source: Royal Society of Chemistry journal article supplement (doi:10.1039/c5ta03127c), 2015-01-01
Supplement: c5ta03127c1.pdf [file c5ta03127c1.pdf]

## Supplementary information

### $\text{Na}_{3.12}\text{Fe}_{2.44}(\text{P}_2\text{O}_7)_2$ /multi-walled carbon nanotube composite as a cathode material for sodium-ion batteries

Yubin Niu<sup>1,2</sup>, Maowen Xu<sup>1,2,\*</sup>, Chuanjun Cheng<sup>1,2</sup>, ShuJuan Bao<sup>1,2</sup>, Junke Hou<sup>1,2</sup>, Sangui Liu<sup>1,2</sup>,  
Fenglian Yi<sup>1,2</sup>, Hong He<sup>1</sup>, Chang Ming Li<sup>1,2,\*</sup>

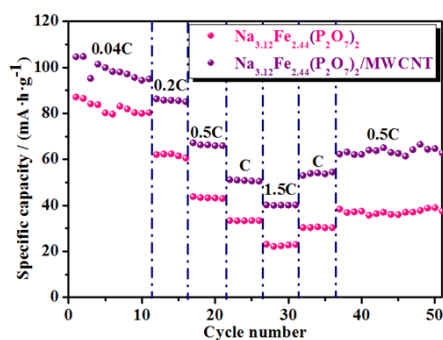

Figure S1. Performance of  $\text{Na}_{3.12}\text{Fe}_{2.44}(\text{P}_2\text{O}_7)_2$  and  $\text{Na}_{3.12}\text{Fe}_{2.44}(\text{P}_2\text{O}_7)_2$  / MWCNT at various rates from 0.04 C to 1.5 C.
